# Supplementary material
Source: PubMed Central journal article supplement (PMC3831612)
Supplement: NIHMS525369-supplement-Supplemental_Table_1.pdf [file NIHMS525369-supplement-Supplemental_Table_1.pdf]

| SNP                      | Location        | Gene                | Genotype   | Detailed location | Allele 1  | Allele 2 | Allele 3 | p-value         |
|--------------------------|-----------------|---------------------|------------|-------------------|-----------|----------|----------|-----------------|
| <i>rs2808</i>            | 10726310        | <i>BCAP29</i>       | C/T        | 3'UTR             | 0         | 0        |          | NA              |
| <i>rs10248755</i>        | 13237390        | <i>INTERGENIC</i>   | A/G        | 3' ETV1           | 9         | 5        |          | 0.28505         |
| <i>rs194025</i>          | 13237848        | <i>INTERGENIC</i>   | A/G        | 3' ETV1           | 2         | 2        |          | 1               |
| <i>rs194020</i>          | 13239854        | <i>INTERGENIC</i>   | C/A        | 3' ETV1           | 15        | 12       |          | 0.563703        |
| <i>rs10225248</i>        | 13247686        | <i>INTERGENIC</i>   | G/T        | 3' ETV1           | 19        | 15       |          | 0.492717        |
| <i>rs12530843</i>        | 13248033        | <i>INTERGENIC</i>   | G/T        | 3' ETV1           | 11        | 18       |          | 0.193647        |
| <i>rs6962700</i>         | 13250882        | <i>INTERGENIC</i>   | T/C        | 3' ETV1           | 6         | 5        |          | 0.763025        |
| <i>rs6967406</i>         | 13251391        | <i>INTERGENIC</i>   | C/G        | 3' ETV1           | 8         | 12       |          | 0.371093        |
| <i>rs6973933</i>         | 13253069        | <i>INTERGENIC</i>   | G/A        | 3' ETV1           | 14        | 21       |          | 0.236724        |
| <i>rs7808903</i>         | 13726860        | <i>INTERGENIC</i>   | G/T        | 3' ETV1           | 10        | 12       |          | 0.669815        |
| <i>rs7783357</i>         | 13729014        | <i>INTERGENIC</i>   | C/T        | 3' ETV1           | 13        | 17       |          | 0.465209        |
| <i>rs1893403</i>         | 13731213        | <i>INTERGENIC</i>   | G/T        | 3' ETV1           | 20        | 14       |          | 0.303484        |
| <i>rs12530542</i>        | 13731501        | <i>INTERGENIC</i>   | C/T        | 3' ETV1           | 22        | 11       |          | 0.055511        |
| <i>rs1942130</i>         | 13733647        | <i>INTERGENIC</i>   | T/C        | 3' ETV1           | 14        | 9        |          | 0.297147        |
| <i>rs2214868</i>         | 13734060        | <i>INTERGENIC</i>   | C/G        | 3' ETV1           | 13        | 17       |          | 0.465209        |
| <i>rs2848839</i>         | 13734285        | <i>INTERGENIC</i>   | G/A        | 3' ETV1           | 12        | 12       |          | 1               |
| <i>rs2214867</i>         | 13734725        | <i>INTERGENIC</i>   | G/A        | 3' ETV1           | 17        | 20       |          |                 |
| <i>rs2568651</i>         | 13735750        | <i>3' ETV1</i>      | C/T        | 3' ETV1           | 2         | 3        |          | 0.654721        |
| <i>rs12537354</i>        | 13735875        | <i>INTERGENIC</i>   | C/G        | 3' ETV1           | 13        | 12       |          | 0.841481        |
| <i>rs2848844</i>         | 13738141        | <i>INTERGENIC</i>   | A/G        | 3' ETV1           | 9         | 14       |          | 0.297147        |
| <i>rs2116633</i>         | 13738349        | <i>INTERGENIC</i>   | C/A        | 3' ETV1           | 9         | 7        |          | 0.617075        |
| <i>rs6969205</i>         | 14244367        | <i>DGKB</i>         | C/T        | INTRON            | 14        | 16       |          | 0.715001        |
| <i>rs10486048</i>        | 14244402        | <i>DGKB</i>         | A/G        | INTRON            | 5         | 5        |          | 1               |
| <i>rs6461075</i>         | 14247910        | <i>DGKB</i>         | A/G        | INTRON            | 17        | 11       |          | 0.256839        |
| <i>rs4721311</i>         | 14248351        | <i>DGKB</i>         | G/T        | INTRON            | 19        | 20       |          | 0.87278         |
| <i>rs6842</i>            | 16834597        | <i>AGR2</i>         | C/T/A      | EXON-MIS/SYN      | 20        | 14       | 0        | 0.303484        |
| <i>rs2237298</i>         | 17348119        | <i>AHR</i>          | A/G        | INTRON            | 2         | 3        |          | 0.654721        |
| <i>rs2158041</i>         | 17368420        | <i>AHR</i>          | G/A        | INTRON            | 10        | 6        |          | 0.317311        |
| <i>rs7811989</i>         | 17371363        | <i>AHR</i>          | G/A        | INTRON            | 18        | 11       |          | 0.193647        |
| <i>rs2040623</i>         | 17380662        | <i>AHR</i>          | T/G        | INTRON            | 1         | 2        |          | 0.563703        |
| <i>rs10257697</i>        | 18090280        | <i>INTERGENIC</i>   | G/A        | 5' HDAC9          | 7         | 5        |          | 0.563703        |
| <i>rs6966799</i>         | 18104972        | <i>INTERGENIC</i>   | T/C        | 5' HDAC9          | 4         | 4        |          | 1               |
| <i>rs2731569</i>         | 18134620        | <i>HDAC9</i>        | C/A        | INTRON            | 8         | 8        |          | 1               |
| <i>rs2697903</i>         | 18152747        | <i>HDAC9</i>        | A/T        | INTRON            | 8         | 14       |          | 0.200825        |
| <b><i>rs1178355</i></b>  | <b>18204811</b> | <b><i>HDAC9</i></b> | <b>G/T</b> | <b>INTRON</b>     | <b>11</b> | <b>3</b> |          | <b>0.032509</b> |
| <i>rs615545</i>          | 18391871        | <i>HDAC9</i>        | A/G        | INTRON            | 2         | 6        |          | 0.157299        |
| <i>rs10486301</i>        | 18409781        | <i>HDAC9</i>        | A/G        | INTRON            | 6         | 7        |          | 0.781511        |
| <i>rs2012064</i>         | 18447324        | <i>HDAC9</i>        | C/G        | INTRON            | 6         | 6        |          | 1               |
| <i>rs213272</i>          | 18504411        | <i>HDAC9</i>        | A/G        | INTRON            | 7         | 4        |          | 0.365712        |
| <i>rs2520459</i>         | 18519676        | <i>HDAC9</i>        | C/T        | INTRON            | 5         | 13       |          | 0.059346        |
| <b><i>rs10243618</i></b> | <b>18522740</b> | <b><i>HDAC9</i></b> | <b>A/G</b> | <b>INTRON</b>     | <b>7</b>  | <b>1</b> |          | <b>0.033895</b> |
| <i>rs17432448</i>        | 18548419        | <i>HDAC9</i>        | A/G        | INTRON            | 3         | 5        |          | 0.4795          |
| <i>rs801758</i>          | 18564562        | <i>HDAC9</i>        | G/A        | INTRON            | 16        | 21       |          | 0.41108         |

|                          |                 |                     |            |               |           |           |  |                 |
|--------------------------|-----------------|---------------------|------------|---------------|-----------|-----------|--|-----------------|
| <i>rs13231835</i>        | 18565058        | <i>HDAC9</i>        | C/T        | INTRON        | 14        | 16        |  | 0.715001        |
| <i>rs11543651</i>        | 18590659        | <i>HDAC9</i>        | C/T        | INTRON        | 4         | 15        |  | 0.011617        |
| <i>rs801763</i>          | 18601365        | <i>HDAC9</i>        | C/T        | INTRON        | 2         | 1         |  | 0.563703        |
| <i>rs2520456</i>         | 18614519        | <i>HDAC9</i>        | G/T        | INTRON        | 19        | 33        |  | 0.052204        |
| <i>rs3807917</i>         | 18616914        | <i>HDAC9</i>        | C/T        | INTRON        | 15        | 12        |  | 0.563703        |
| <i>rs1615309</i>         | 18619934        | <i>HDAC9</i>        | C/T        | INTRON        | 5         | 12        |  | 0.089555        |
| <i>rs2520458</i>         | 18622929        | <i>HDAC9</i>        | G/T        | INTRON        | 16        | 13        |  | 0.577469        |
| <i>rs2073974</i>         | 18624800        | <i>HDAC9</i>        | C/T        | INTRON        | 1         | 0         |  | 0.317311        |
| <i>rs1726595</i>         | 18625532        | <i>HDAC9</i>        | A/G        | INTRON        | 14        | 13        |  | 0.84739         |
| <i>rs2695029</i>         | 18626623        | <i>HDAC9</i>        | A/G        | INTRON        | 6         | 6         |  | 1               |
| <i>rs2695028</i>         | 18627486        | <i>HDAC9</i>        | C/T        | INTRON        | 10        | 16        |  | 0.239317        |
| <b><i>rs1726610</i></b>  | <b>18630208</b> | <b><i>HDAC9</i></b> | <b>G/T</b> | <b>INTRON</b> | <b>16</b> | <b>5</b>  |  | <b>0.016377</b> |
| <i>rs2695027</i>         | 18631680        | <i>HDAC9</i>        | C/T        | INTRON        | 14        | 13        |  | 0.84739         |
| <i>rs3814992</i>         | 18634929        | <i>HDAC9</i>        | G/A        | INTRON        | 9         | 10        |  | 0.818546        |
| <i>rs3814993</i>         | 18635277        | <i>HDAC9</i>        | C/T        | INTRON        | 8         | 11        |  | 0.491297        |
| <i>rs2704280</i>         | 18640746        | <i>HDAC9</i>        | G/A        | INTRON        | 11        | 19        |  | 0.144127        |
| <i>rs6963748</i>         | 18666217        | <i>HDAC9</i>        | C/T        | INTRON        | 4         | 9         |  | 0.165518        |
| <i>rs2188320</i>         | 18666901        | <i>HDAC9</i>        | A/C        | INTRON        | 11        | 14        |  | 0.548506        |
| <b><i>rs801540</i></b>   | <b>18672384</b> | <b><i>HDAC9</i></b> | <b>G/T</b> | <b>INTRON</b> | <b>8</b>  | <b>30</b> |  | <b>0.000359</b> |
| <i>rs2269754</i>         | 18699475        | <i>HDAC9</i>        | A/G        | INTRON        | 6         | 2         |  | 0.157299        |
| <b><i>rs1178108</i></b>  | <b>18743747</b> | <b><i>HDAC9</i></b> | <b>A/G</b> | <b>INTRON</b> | <b>6</b>  | <b>19</b> |  | <b>0.009322</b> |
| <b><i>rs1178112</i></b>  | <b>18746213</b> | <b><i>HDAC9</i></b> | <b>A/G</b> | <b>INTRON</b> | <b>3</b>  | <b>13</b> |  | <b>0.012419</b> |
| <i>rs1178117</i>         | 18750392        | <i>HDAC9</i>        | G/T        | INTRON        | 12        | 10        |  | 0.669815        |
| <i>rs1178121</i>         | 18762652        | <i>HDAC9</i>        | A/C        | INTRON        | 2         | 4         |  | 0.414216        |
| <i>rs212664</i>          | 18763117        | <i>HDAC9</i>        | C/A        | INTRON        | 12        | 17        |  | 0.35316         |
| <i>rs1178127</i>         | 18767343        | <i>HDAC9</i>        | A/G        | EXON-SYNON    | 6         | 8         |  | 0.59298         |
| <i>rs1178128</i>         | 18767714        | <i>HDAC9</i>        | A/G        | INTRON        | 5         | 4         |  | 0.738883        |
| <i>rs1178129</i>         | 18768334        | <i>HDAC9</i>        | G/T        | INTRON        | 6         | 1         |  | 0.058782        |
| <b><i>rs11764116</i></b> | <b>18800413</b> | <b><i>HDAC9</i></b> | <b>G/T</b> | <b>INTRON</b> | <b>11</b> | <b>1</b>  |  | <b>0.003892</b> |
| <i>rs17139840</i>        | 18800603        | <i>HDAC9</i>        | C/T        | INTRON        | 4         | 2         |  | 0.414216        |
| <i>rs6959028</i>         | 18806051        | <i>HDAC9</i>        | C/A        | INTRON        | 17        | 13        |  | 0.465209        |
| <i>rs13241957</i>        | 18808396        | <i>HDAC9</i>        | T/C        | INTRON        | 5         | 3         |  | 0.4795          |
| <i>rs7776786</i>         | 18810243        | <i>HDAC9</i>        | C/T        | INTRON        | 10        | 9         |  | 0.818546        |
| <i>rs1011446</i>         | 18811610        | <i>HDAC9</i>        | A/G        | INTRON        | 6         | 7         |  | 0.781511        |
| <i>rs7783171</i>         | 18828796        | <i>HDAC9</i>        | G/T        | INTRON        | 12        | 17        |  | 0.35316         |
| <i>rs2028016</i>         | 18834799        | <i>HDAC9</i>        | A/G        | INTRON        | 7         | 3         |  | 0.205903        |
| <i>rs10950704</i>        | 18836179        | <i>HDAC9</i>        | A/G        | INTRON        | 6         | 9         |  | 0.438578        |
| <b><i>rs12540872</i></b> | <b>18836667</b> | <b><i>HDAC9</i></b> | <b>G/A</b> | <b>INTRON</b> | <b>24</b> | <b>11</b> |  | <b>0.027992</b> |
| <i>rs6974011</i>         | 18838463        | <i>HDAC9</i>        | C/A        | INTRON        | 9         | 10        |  | 0.818546        |
| <i>rs12531908</i>        | 18838616        | <i>HDAC9</i>        | G/A        | INTRON        | 9         | 11        |  | 0.654721        |
| <i>rs7810384</i>         | 18844771        | <i>HDAC9</i>        | C/T        | INTRON        | 15        | 19        |  | 0.492717        |
| <b><i>rs10269422</i></b> | <b>18854601</b> | <b><i>HDAC9</i></b> | <b>T/A</b> | <b>INTRON</b> | <b>3</b>  | <b>12</b> |  | <b>0.020137</b> |
| <i>rs13241157</i>        | 18860014        | <i>HDAC9</i>        | A/G        | INTRON        | 4         | 9         |  | 0.165518        |
| <i>rs17349860</i>        | 18868031        | <i>HDAC9</i>        | C/T        | INTRON        | 2         | 7         |  | 0.095581        |
| <i>rs957960</i>          | 18877408        | <i>HDAC9</i>        | A/C        | INTRON        | 7         | 14        |  | 0.12663         |

|                   |           |              |     |          |    |    |  |          |
|-------------------|-----------|--------------|-----|----------|----|----|--|----------|
| <i>rs756853</i>   | 18890000  | <i>HDAC9</i> | A/G | INTRON   | 8  | 9  |  | 0.808365 |
| <i>rs2249817</i>  | 18896011  | <i>HDAC9</i> | A/G | INTRON   | 0  | 1  |  | 0.317311 |
| <i>rs6461389</i>  | 18907030  | <i>HDAC9</i> | C/T | INTRON   | 9  | 11 |  | 0.654721 |
| <i>rs1034805</i>  | 18977403  | <i>HDAC9</i> | C/T | INTRON   | 4  | 11 |  | 0.070701 |
| <i>rs10223990</i> | 18979516  | <i>HDAC9</i> | A/G | INTRON   | 6  | 12 |  | 0.157299 |
| <i>rs11505418</i> | 18993249  | <i>HDAC9</i> | C/T | INTRON   | 17 | 11 |  | 0.256839 |
| <i>rs10486330</i> | 18994401  | <i>HDAC9</i> | G/A | INTRON   | 18 | 13 |  | 0.369171 |
| <i>rs17140399</i> | 18998604  | <i>HDAC9</i> | C/A | INTRON   | 12 | 6  |  | 0.157299 |
| <i>rs6461396</i>  | 19001691  | <i>HDAC9</i> | T/C | INTRON   | 5  | 10 |  | 0.196706 |
| <i>rs7808451</i>  | 19002886  | <i>HDAC9</i> | G/T | INTRON   | 5  | 7  |  | 0.563703 |
| <i>rs993083</i>   | 19009704  | <i>HDAC9</i> | T/C | INTRON   | 2  | 6  |  | 0.157299 |
| <i>rs6968777</i>  | 19011349  | <i>HDAC9</i> | T/C | INTRON   | 12 | 18 |  | 0.273322 |
| <i>rs2240279</i>  | 19018009  | <i>HDAC9</i> | G/A | INTRON   | 12 | 9  |  | 0.512691 |
| <i>rs10268180</i> | 19019671  | <i>HDAC9</i> | T/C | INTRON   | 11 | 10 |  | 0.827259 |
| <i>rs2717349</i>  | 19023736  | <i>HDAC9</i> | C/G | INTRON   | 20 | 13 |  | 0.223018 |
| <i>rs2526632</i>  | 19032809  | <i>HDAC9</i> | G/T | INTRON   | 3  | 7  |  | 0.205903 |
| <i>rs7776735</i>  | 19036909  | <i>HDAC9</i> | C/T | 3'UTR    | 3  | 1  |  | 0.317311 |
| <i>rs34426483</i> | 105615426 | <i>CDHR3</i> | C/G | EXON-MIS | 12 | 9  |  | 0.512691 |
| <i>rs176501</i>   | 105752691 | <i>SYPL1</i> | A/G | 5' UTR   | 10 | 18 |  | 0.13057  |
| <i>rs2074796</i>  | 112112279 | <i>IFRD1</i> | A/G | EXON-SYN | 3  | 9  |  | 0.083265 |

Supporting Information Table 1: **All SNPs for preferential allelic imbalance analysis.**

108 SNPs in and around eight candidate genes at *SKTS5* were part of the initial allelic imbalance study. Two SNPs were eliminated due to contamination issues or if they were out of Hardy-Weinberg equilibrium. Of the 108 SNPs, nine (bolded) showed evidence of preferential allelic imbalance in cSCC tumors. UTR, untranslated region; MIS, missense polymorphism; SYN, synonymous polymorphism. p-values are unadjusted.
